# Supplementary material for: Trends in resting pulse rates in 9–11-year-old children in the UK 1980–2008
Source: PubMed Central journal article supplement — Arch Dis Child. 2013 Nov 13;99(1):10–4. doi: 10.1136/archdischild-2013-304699 (PMC3888592; doi:10.1136/archdischild-2013-304699), 2013-11-13
Supplement: archdischild-2013-304699-s1.pdf [file archdischild-2013-304699-s1.pdf]

## Appendix

**Table A:** Regression coefficients (95% CI) for resting pulse rate (bpm)\* on study year (1980-2008), BMI (kg/m<sup>2</sup>), and Height (cm)† based on different samples of children (compare to ‘All Children’)

| <b>Boys</b>    | <b>All Children</b> | <b>National Sample#</b> | <b>Automated only§</b> | <b>9-10y&amp;</b> |
|----------------|---------------------|-------------------------|------------------------|-------------------|
| Year (1980-08) | 0.07 (0.04,0.09)    | 0.07 (0.04,0.09)        | 0.06(0.00,0.12)        | 0.06(0.04,0.09)   |
| <b>Girls</b>   |                     |                         |                        |                   |
| Year (1980-08) | 0.04(0.01,0.06)     | 0.03(0.01,0.06)         | 0.08 (0.05,0.10)       | 0.04(0.01,0.07)   |

† Measures of resting pulse rate, BMI, and height were centred at mean age (10.3y).

# 1970 cohort and HSE (excluding the Brompton, Two-Towns, and Ten-Towns studies).

§ Two-Towns and Ten-Towns studies, HSE (excluding 1970 cohort and Brompton study).

& All studies excluding 11y children.
